# Supplementary material for: Transcription of Leishmania major U2 small nuclear RNA gene is directed by extragenic sequences located within a tRNA-like and a tRNA-Ala gene
Source: PubMed Central journal article supplement (PMC4950102; doi:10.1186/s13071-016-1682-3), 2016-07-19

**a****tRNA-Ala (73 nt)**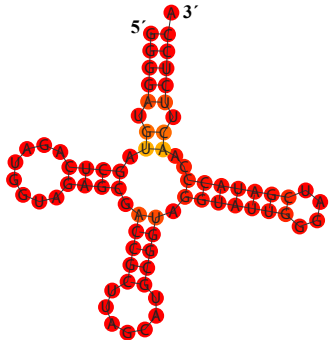**b****tRNA-like (109 nt)**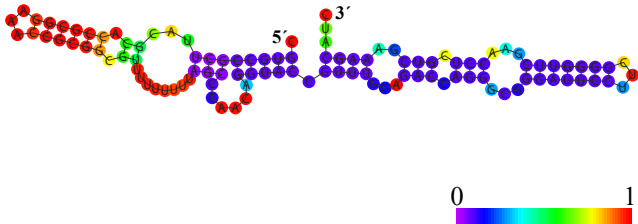

Supplement: 13071_2016_1682_MOESM4_ESM.pdf [file 13071_2016_1682_MOESM4_ESM.pdf]
