# Supplementary material for: Transcription of Leishmania major U2 small nuclear RNA gene is directed by extragenic sequences located within a tRNA-like and a tRNA-Ala gene
Source: PubMed Central journal article supplement (PMC4950102; doi:10.1186/s13071-016-1682-3), 2016-07-19
Supplement: 13071_2016_1682_MOESM5_ESM.pdf [file 13071_2016_1682_MOESM5_ESM.pdf]

**Tcr chr23** CCGTGCAAATGAATCCCCGCTTTTTTTTAGGCTTCTTTAATGTGGAGTTGTGTGGTCTGTTTTTTTGGGAA.AAAGTTGGCG -179  
**Tcr chr37** ATGTGCCCCGACACGCCCTAAACACGTT...GCTTTCGTTTTCCAGGGGACAACGCAAATGCGCTCGATTGTTTCGAGGAGCAAAAGTAACA -164  
**Tcr chr6** ATGTGCCCCGACACGCCCTAAACATGCC...GCTTTCGTTTTCCAGAAGACAACGCAAATGCGCCCGATTGTTTCGAGGAGCAAAAGCAACA -162  
**Conserved** gtgc a cc g ttc tt g g t g t g t gga aaa c

**Box B**

**Box A**

**Tcr chr23** TTTCTTT **CGAATCGAAC** CGTGACCCTTGGCAATGTTTGTTCGGACTCTGGAGCGTCTTAG **ACATTTAAGCTA** AGAAGTAACGTTGCC -89  
**Tcr chr37** CTTTCGTAAGCTATAAACACATAT.....GTATCCAATCCGAA...TAGAGCGT..TGA **ACAATTAAGCGA** GGAAGGGACGGAAGAA -88  
**Tcr chr6** CTTTGTAAAGCTGTAAATACTT.....GTATCCAATCCGAA...TAGAGCGT..TGA **ACAATTAAGCGA** GGAGGGGACGGACGAA -88  
**Conserved** tt t g aa ct tt t cg a t gacgt t **aca ttaagc a** ga g acg

**U2 snRNA**

**Tcr chr23** GTCGTTTGTAAGATTACGATGGAAAAATCCCCATTTGGTTTCGAAACTATTTTTACGAGGTTACTCTGTTAATTGGAGACGGCTGTGT **AT** +2  
**Tcr chr37** TTCTTTAGCAAGATTGCGATC.AAAAAATCCCCATTTGGTTTCGAAACTATTTTTACGAGGTTACTTTTTAATTGGGAGCTGTTGTGTGT +2  
**Tcr chr6** TTCTTTAGCAAGATTGCGATC.AAAAACTCCCCATTTGGTTTCGAAACTATTTTTACGAGGTTACTTTTTAATTGGGAGCTGTTGTGTGT +2  
**Conserved** tc tt g aagatt cgat aaaaa tccccatttggttt gaaactatttttacgaggttac t ttattgg c g tgtgt t

**Tcr chr23** **ATCTTCTCGACTATTTAGCTAAGATCAAGTTTTTAAACTGTTCTTATCAGAGTAATTCTCGATATGGGCTTCGTCCAGGAATAGAAAAC** +92  
**Tcr chr37** ATCTTCTCGACTATTTAGCTAAGATCAAGTTTTTAAACTGTTCTTATCAGAGTAATTCTCGATATGGGCTTCGTCCAGGAATAGAAAAC +92  
**Tcr chr6** ATCTTCTCGACTATTTAGCTAAGATCAAGTTTTTAAACTGTTCTTATAAGAGTAATTCTCGATATGGGCTTCATCCAGGAATAAAAAC +92  
**Conserved** atcttctcg ctatttagctaagatcaagtttttaactgttcttat agagtaattctcga atgggcttc tccaggaata aaacc

**Tcr chr23** **GCTGATCTCTCAAGCGTCTTCGGAGTTCACGTTCCGGATGGAGGCGCTTCCTTTTCCAAAATCGTGTTCGCTTTTACAAAAT.....** +177  
**Tcr chr37** GCTGATCTCTCAGGCGTCTTCGGAGTTCGCGTTCGGATGGAGCGTCTTCCTTTTCCAAAATGTGTTCGCTTTTTCCTTTTTTTTTT +182  
**Tcr chr6** GCTGATCTCTCAGGCGTCTTCGGAGTTCGCGTTCGGATGGAGCGTCTCT...CAAAATGTGTTCGCTTTTTCCTTTTTTTTTT. +178  
**Conserved** gctgatctctca gcttcttccggagtt c cg gtccggatggagcg tctt ccaaaat gtgttcgctttt c t
